# Supplementary material
Source: PubMed Central journal article supplement (PMC3541490)
Supplement: supp_nss056_supp.pdf [file supp_nss056_supp.pdf]

# The Effect of Meditation on Brain Structure: Cortical Thickness Mapping and Diffusion Tensor Imaging

Kang DH, Jo HJ, Jung WH, Kim SH, Jung YH, Choi CH, Lee US, An SC, Jang JH, Kwon JS

**Supplementary Figure S1.** Group differences in cortical thickness measurements according to smoothing kernel size.

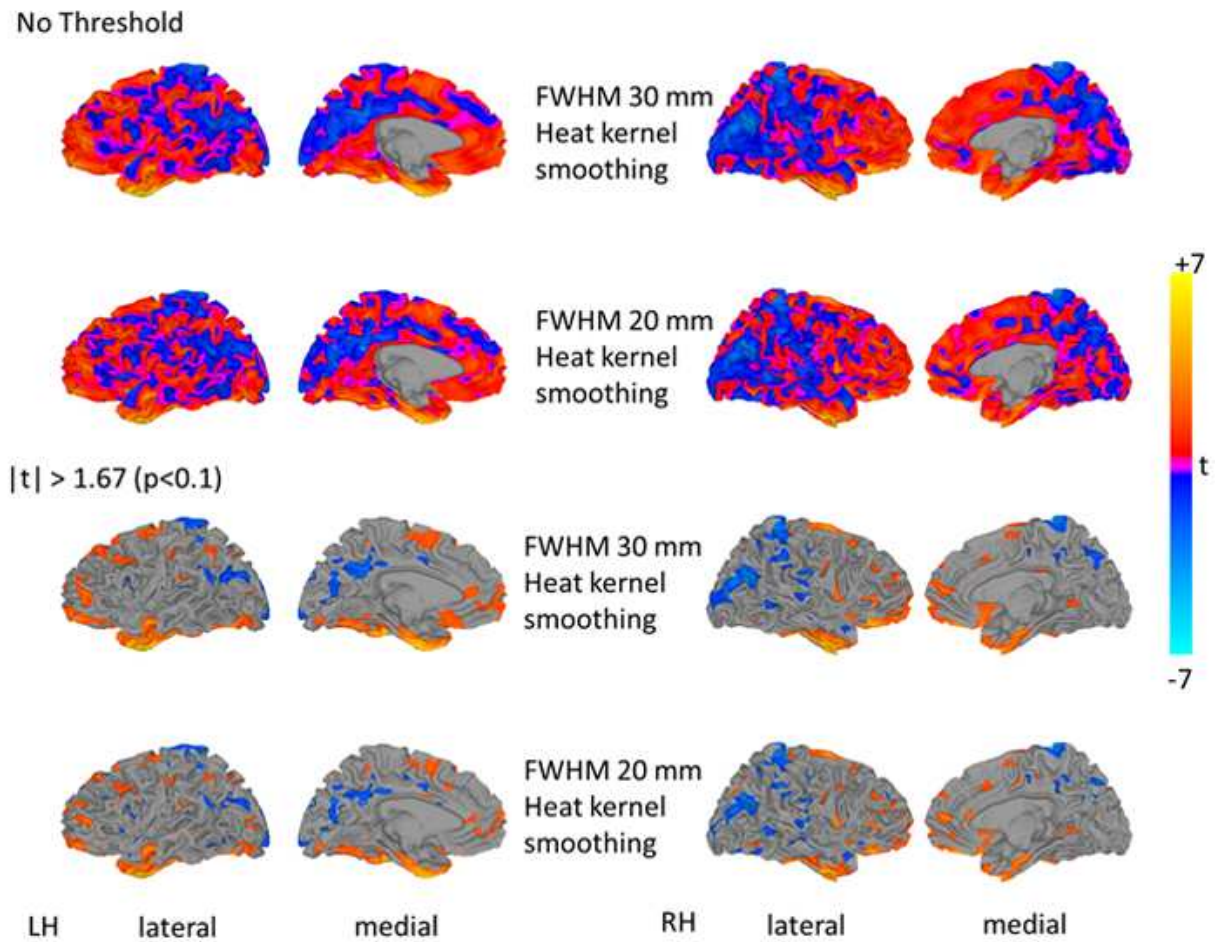

This supplementary figure is 30 mm and 20 mm results (with or without thresholds). There were no big differences within the ranges (20~30 mm). FWHM 20~30 mm is typical spatial kernel size in surface space and this is different from the smoothing kernel in 3D volume.

**Supplementary Figure S2.** Group differences in cortical thickness measurements before and after surface clustering.

Before clustering ( $|t| > 1.97$ )

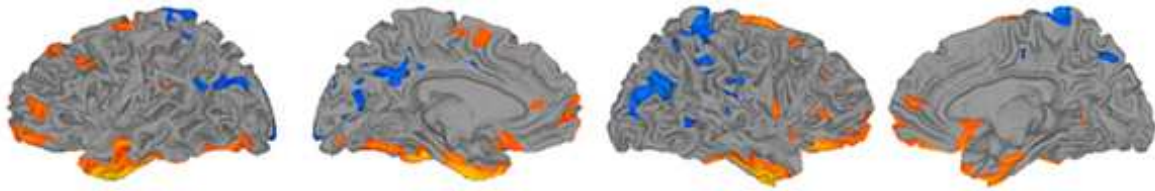

Alpha = 0.01 ( $|t| > 1.97$ , The number of continuous vertices  $N > 214$ )

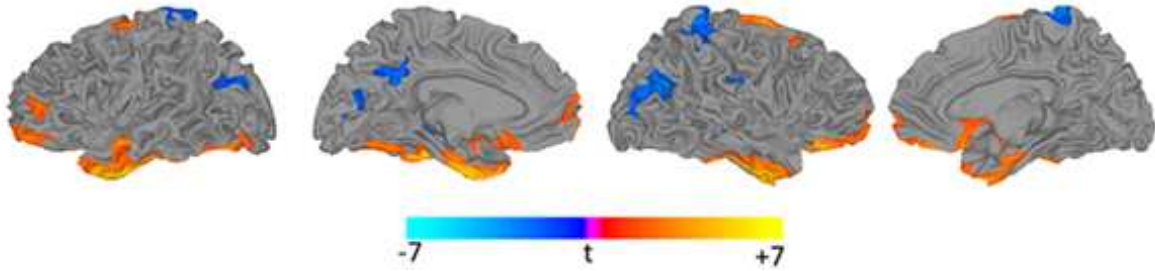

This supplementary figure is the results before and after clustering to help readers' understanding. The AlphaSim in surface space should be calculated by considering vertex number and the length of edges. We referred FreeSurfer's recommending tables for it included in FreeSurfer package.  $N > 214$  means continuous 214 vertices are the minimum cluster size at a certain threshold level. In our surface models and cortical thickness results, the minimum size of clusters is  $194 \text{ mm}^2$ .

**Supplementary Figure S3.** Clustering result of Figure 1B with the same threshold level to Figure 1A.

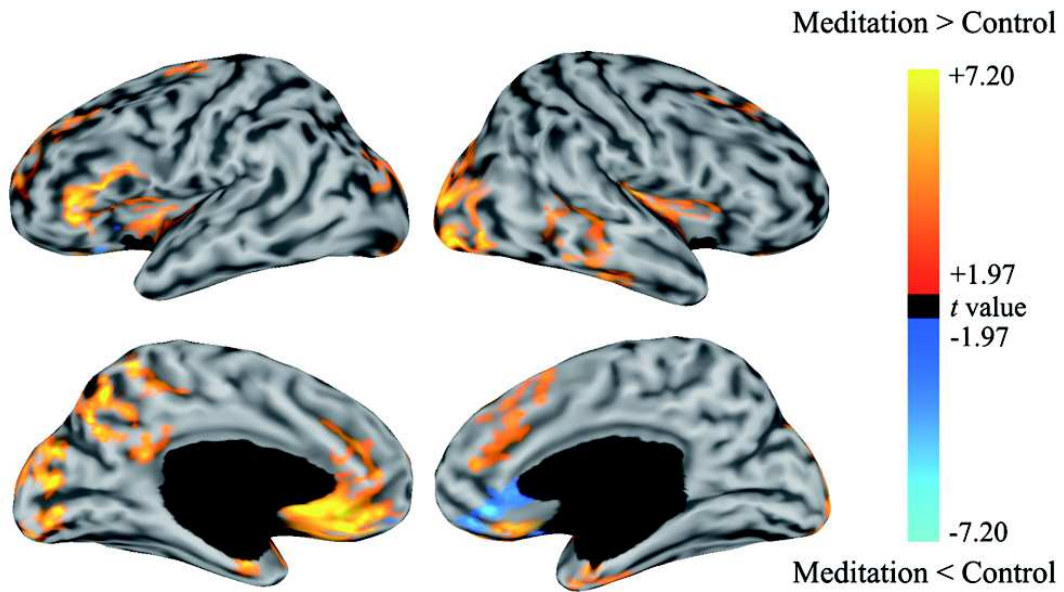

This supplementary figure presents clustering results after cortical representation of FA difference at the same threshold to the cortical thickness result in Figure 1A. This is not a stringent statistical test but an approximation via the cortical representation of volume data due to the difference in data spaces.

**Supplementary Figure S4.** The result based on FDR correction of Figure 1A (between-group differences in cortical thickness) with the same threshold level to Figure 1B.

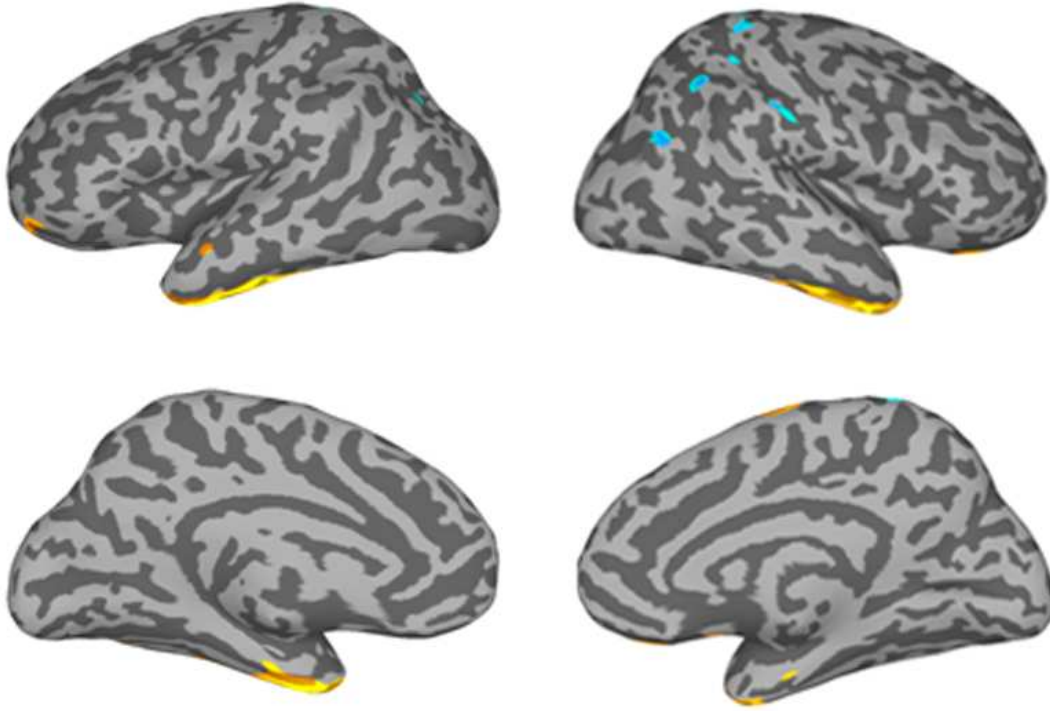

This supplementary figure presents the result of between-group differences in cortical thickness at the same threshold (FDR  $q < 0.05$ ) to the FA result in Figure 1B. This is a stringent statistical test.



**Supplementary Figure S5.** White matter regions in volume space showing the statistical differences in FA value between meditation practitioners and control subjects.

<Axial images>

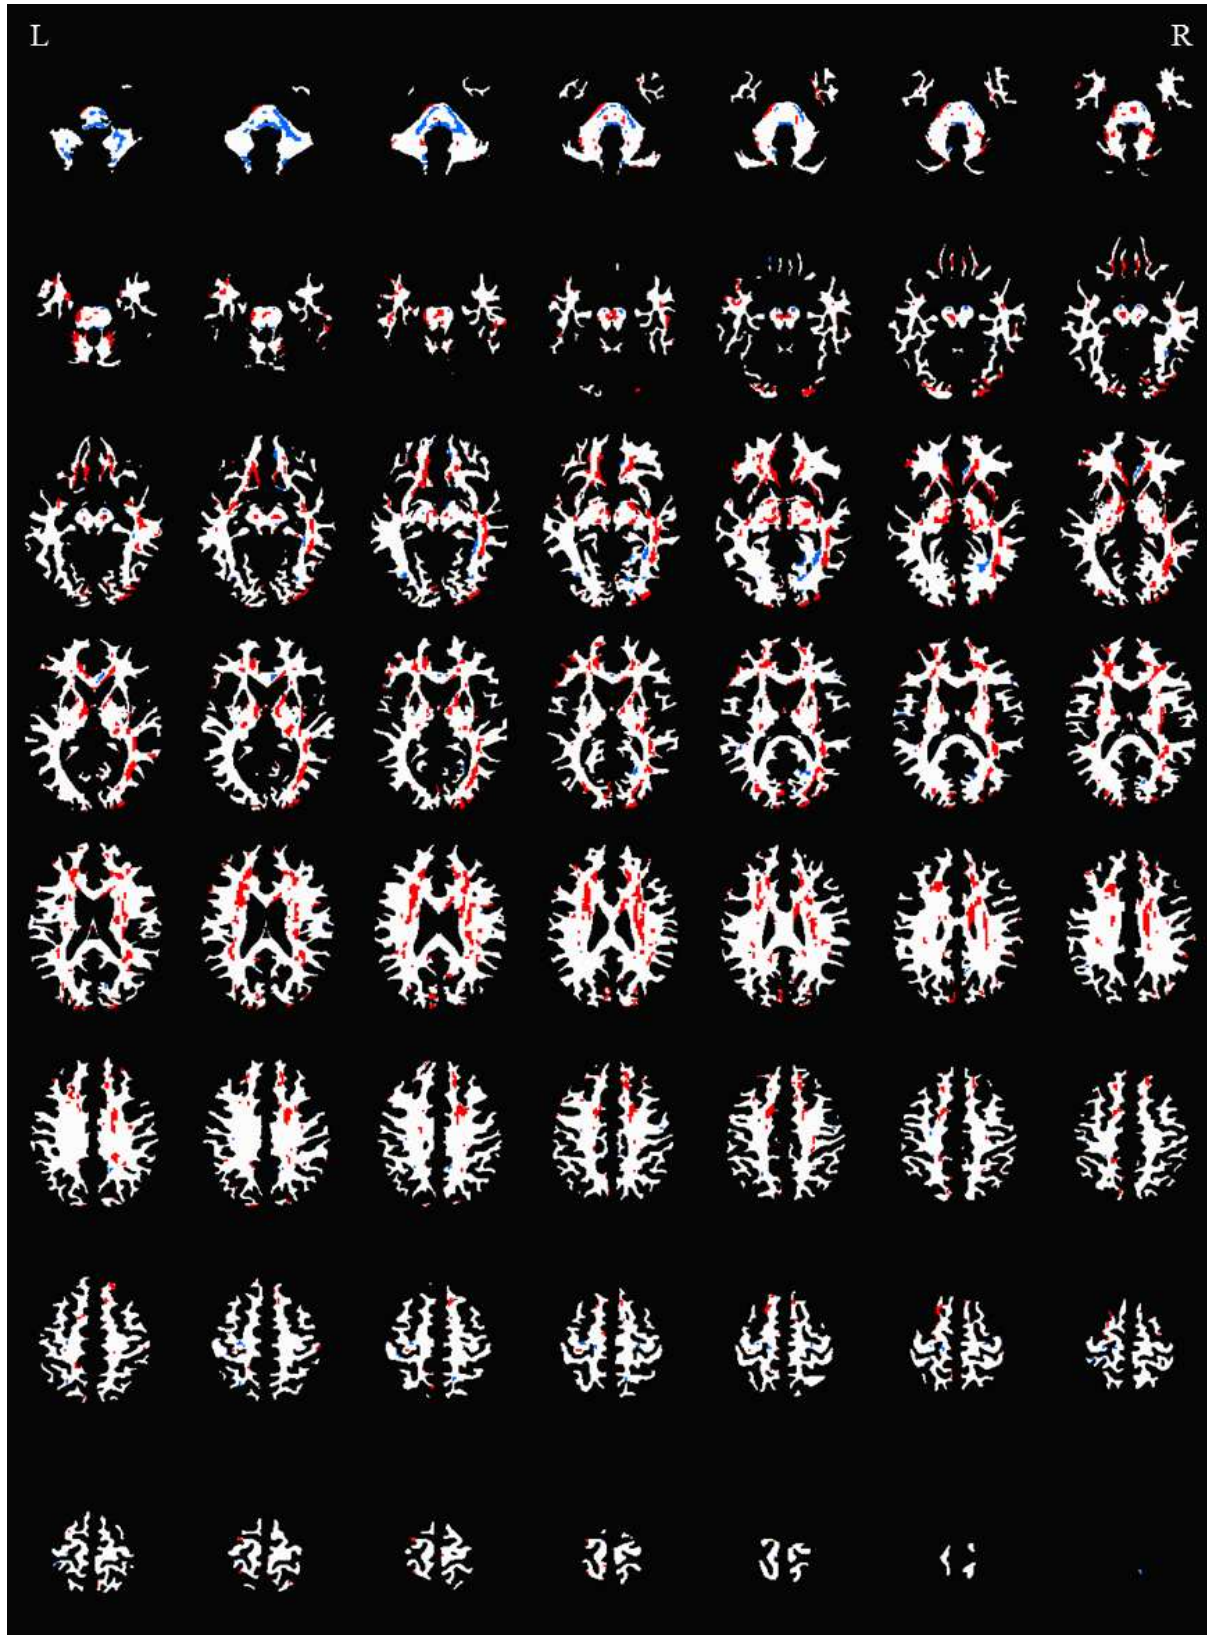

<Sagittal images>

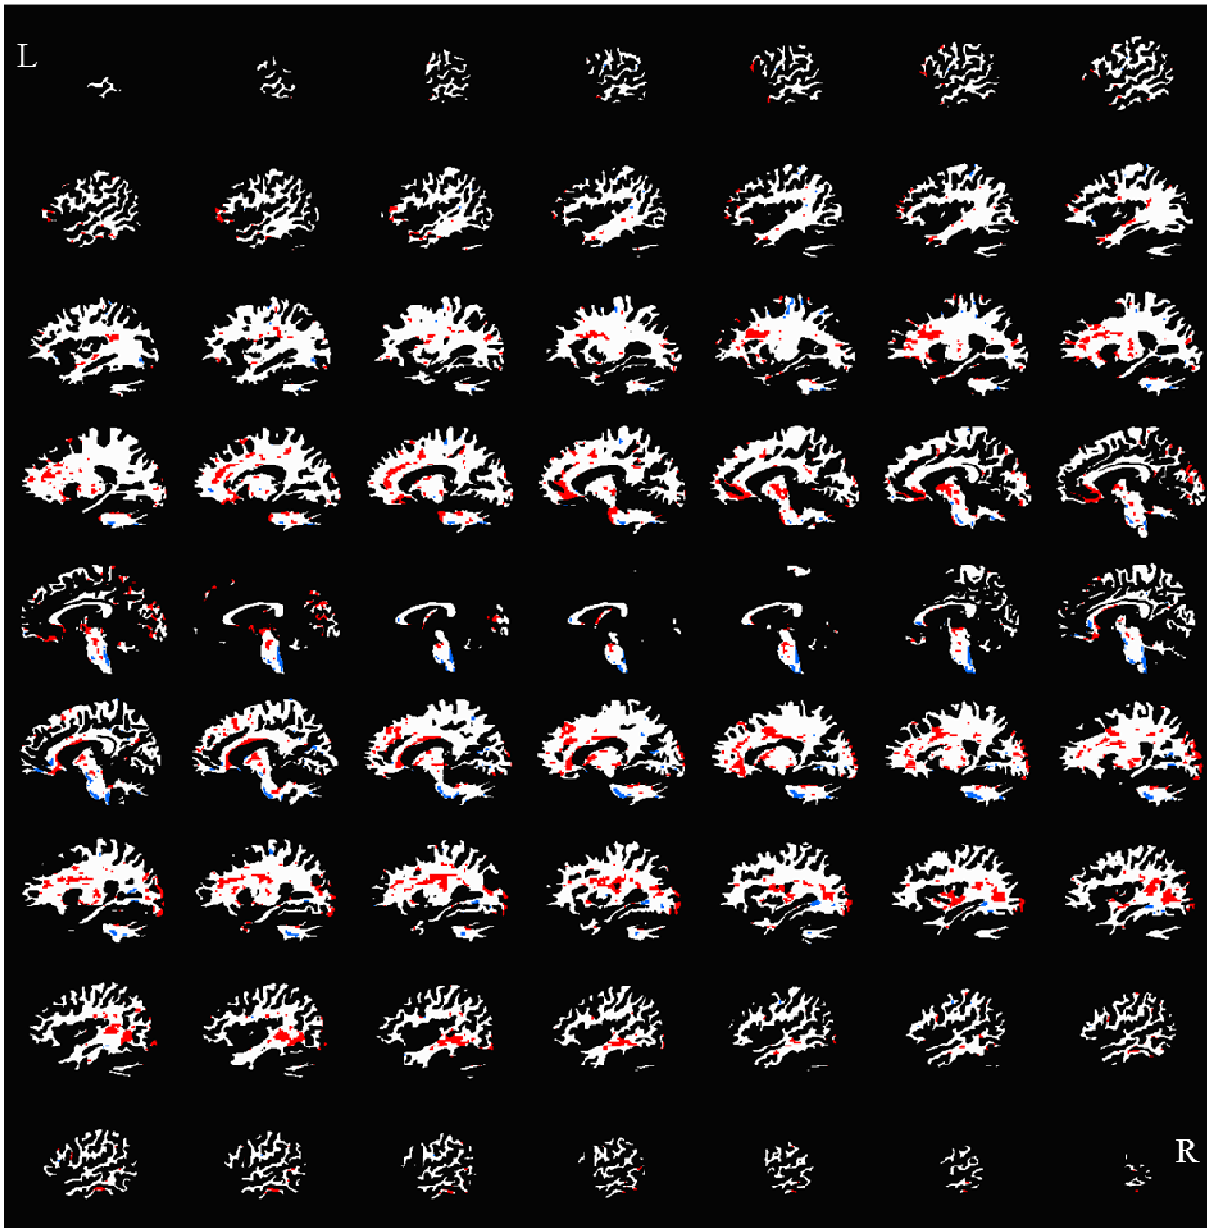

This supplementary figure shows FA difference in white matter structures deeper than the locations close to cortex that is used in the manuscript. The group statistics result ( $p < 0.01$ ) was mapped on the white matter tissue map of N27 template brain. Red colors indicate higher FA values in meditators than controls, while blue colors indicate higher FA values in controls than meditators.

**Supplementary Table S1.** Brain regions with significant fractional anisotropy differences between meditation practitioners and control subjects.

| Brain region                                         | Area<br>(mm <sup>2</sup> ) | Mean<br><i>t</i> -value | Mean<br><i>p</i> -value | Peak<br><i>t</i> -value | Peak<br><i>p</i> -value | Talairach coordinates |
|------------------------------------------------------|----------------------------|-------------------------|-------------------------|-------------------------|-------------------------|-----------------------|
| <b>Left hemisphere</b>                               |                            |                         |                         |                         |                         |                       |
| Genu of cingulate cortex (forceps minor)             | 2643.08                    | 3.278                   | 0.002                   | 7.94                    | <0.0001                 | -10, 27, -4           |
| Frontal pole                                         | 1013.29                    | 2.676                   | 0.0103                  | 4.369                   | <0.0001                 | -45, 36, 12           |
| Cuneus                                               | 1007.09                    | 2.943                   | 0.0051                  | 5.429                   | <0.0001                 | -5, -81, 27           |
| Precuneus                                            | 790.28                     | 2.596                   | 0.0126                  | 5.165                   | <0.0001                 | -4, -59, 42           |
| Frontal pole (forceps minor)                         | 764.38                     | 2.538                   | 0.0146                  | 5.74                    | <0.0001                 | -22, 47, 14           |
| Inferior temporal cortex                             | 735.66                     | 2.691                   | 0.0099                  | 4.547                   | <0.0001                 | -23, -86, -17         |
| Temporal pole (UNC)                                  | 543.22                     | 2.435                   | 0.0188                  | 3.658                   | 0.0007                  | -34, 12, -21          |
| Lateral occipital cortex (IFOF)                      | 465.07                     | 2.46                    | 0.0177                  | 3.685                   | 0.0006                  | -28, -77, 10          |
| Precuneus                                            | 365.57                     | 2.62                    | 0.0119                  | 4.279                   | <0.0001                 | -4, -49, 55           |
| Precentral cortex                                    | 296.17                     | 2.476                   | 0.017                   | 3.968                   | 0.0003                  | -26, -13, 64          |
| Parahippocampal cortex                               | 254.59                     | 2.614                   | 0.0121                  | 3.934                   | 0.0003                  | -20, -4, -24          |
| Posterior cingulate cortex (forceps major)           | 237.76                     | 2.527                   | 0.015                   | 3.527                   | 0.001                   | -6, -44, 18           |
| Superior longitudinal fasciculus                     | 204.15                     | 2.567                   | 0.0136                  | 3.351                   | 0.0016                  | -27, 11, 18           |
| <b>Right hemisphere</b>                              |                            |                         |                         |                         |                         |                       |
| Inferior temporal cortex (IFOF)                      | 2476.51                    | 2.928                   | 0.0053                  | 5.568                   | <0.0001                 | 26, -89, -17          |
| Inferior temporal cortex (tSLF)                      | 1139.94                    | 2.681                   | 0.0102                  | 4.704                   | <0.0001                 | 52, -28, -17          |
| Insula                                               | 847.28                     | 2.727                   | 0.009                   | 5.375                   | <0.0001                 | 30, -23, 12           |
| Anterior cingulate cortex (cingulum)                 | 639.44                     | 2.504                   | 0.0159                  | 3.922                   | 0.0003                  | 14, 30, 21            |
| Subcallosal cortex                                   | 565.65                     | 2.942                   | 0.0051                  | 4.698                   | <0.0001                 | 1, -12, 9             |
| Temporal pole                                        | 457.07                     | 2.525                   | 0.0151                  | 3.934                   | 0.0003                  | 24, 6, -32            |
| Subcallosal cortex                                   | 435.99                     | 1.404                   | 0.167                   | 5.928                   | <0.0001                 | 6, 24, -11            |
| Paracingulate cortex                                 | 398.36                     | -2.547                  | 0.0143                  | -4.075                  | 0.0002                  | 8, 42, -7             |
| Superior corona radiation                            | 391.54                     | 2.495                   | 0.0162                  | 3.971                   | 0.0003                  | 19, 5, 40             |
| Orbitofrontal cortex (UNC/anterior corona radiation) | 343.83                     | 2.556                   | 0.014                   | 4.092                   | 0.0002                  | 16, 29, -12           |
| Anterior thalamic radiation                          | 298.24                     | 2.610                   | 0.0122                  | 4.564                   | <0.0001                 | 9, -30, 8             |
| Cuneus                                               | 31.99                      | -3.598                  | 0.008                   | -3.938                  | 0.0003                  | 15, -60, 12           |

Abbreviations: UNC, uncinate fasciculus; IFOF, inferior fronto-occipital fasciculus; tSLF, temporal part of superior longitudinal fasciculus. Coordinates for the voxel central to each cluster were labeled with Talairach atlas, Harvard-Oxford cortical and subcortical structural atlases, Johns Hopkins University DTI-based WM atlas, and Johns Hopkins University white matter tractography atlas.
